# Supplementary material
Source: ML conference proceedings conference paper supplement (https://openaccess.thecvf.com/content/ICCV2025/html/Zhu_ObjectGS_Object-aware_Scene_ICCV_2025_paper.html)
Supplement: Supplementary file 1 [file Zhu_ObjectGS_Object-aware_Scene_ICCV_2025_supplemental.pdf]

# ObjectGS: Object-aware Scene Reconstruction and Scene Understanding via Gaussian Splatting

## Supplementary Material

### 7. Training Overhead

Table 8 compares training time, FPS, and GPU memory across different instance counts. Even with about 100 instances, overhead remains minimal with efficient parallel rasterizer. Notably, since our one-hot ID encoding is not learnable parameters, it will not significantly increase training overhead. Meanwhile, we can optionally encode only a subset of target instances or leverage category hierarchies, avoiding the waste and inflexibility of fixed-length representations under long-tailed distributions. Therefore, in real applications, our method is both more flexible and scalable.

### 8. Voting Algorithm

We provide the pseudo code of Algorithms 1 to 3 to clearly demonstrate the proposed voting strategies.

### 9. More Visualization

We provide more visualization results as shown in Figs. 9 to 14, which includes visualization of OVS segmentation results, panoptic segmentation results, and 3D instance segmentation with point clouds.

---

#### Algorithm 1 Object ID Majority Voting

---

```
1: Input:
2:   Point cloud:  $P_{3D} = \{p_1, p_2, \dots, p_M\}$ 
3:   Object ID maps:  $L = \{L_1, L_2, \dots, L_N\}$ 
4:   Camera poses:  $C = \{C_1, C_2, \dots, C_N\}$ 
5: Initialization:
6:   labels =  $\emptyset$ 
7: for each point  $p_i \in P_{3D}$  do
8:   for each camera pose  $C_j \in C$  do
9:      $x_i = \text{Project}(p_i, C_j)$ 
10:    Append  $L_j(x_i)$  to labels[ $p_i$ ]
11:   end for
12: end for
13: for each point  $p_i \in P_{3D}$  do
14:   if labels[ $p_i$ ]  $\neq \emptyset$  then
15:     frequency(ID) = Counter(labels[ $p_i$ ])
16:     ID = arg max frequency(ID)
17:   end if
18:   Update  $p_i = (x_i, y_i, z_i, \text{object ID})$ 
19: end for
20: Output: Updated point cloud  $P_{3D}$  with object IDs.
```

---

---

#### Algorithm 2 Object ID Probability-based Voting

---

```
1: Input:
2:   Point cloud:  $P_{3D} = \{p_1, p_2, \dots, p_M\}$ 
3:   Object ID maps:  $L = \{L_1, L_2, \dots, L_N\}$ 
4:   Camera poses:  $C = \{C_1, C_2, \dots, C_N\}$ 
5: Initialization:
6:   labels =  $\emptyset$ 
7: for each point  $p_i \in P_{3D}$  do
8:   for each camera pose  $C_j \in C$  do
9:      $x_i = \text{Project}(p_i, C_j)$ 
10:    Append  $L_j(x_i)$  to labels[ $p_i$ ]
11:   end for
12: end for
13: for each point  $p_i \in P_{3D}$  do
14:   if labels[ $p_i$ ]  $\neq \emptyset$  then
15:     frequency(ID) = Counter(labels[ $p_i$ ])
16:     ID = Random(Prob = frequency(ID))
17:   end if
18:   Update  $p_i = (x_i, y_i, z_i, \text{object ID})$ 
19: end for
20: Output: Updated point cloud  $P_{3D}$  with object IDs.
```

---

---

#### Algorithm 3 Object ID Correspondence-based Voting

---

```
1: Input:
2:   Point cloud:  $P_{3D} = \{p_1, p_2, \dots, p_M\}$ 
3:   Object ID maps:  $L = \{L_1, L_2, \dots, L_N\}$ 
4:   Correspondences:  $C = \{C_1, C_2, \dots, C_N\}$ 
5: Initialization:
6:   labels =  $\emptyset$ 
7: for each point  $p_i \in P_{3D}$  do
8:   for each correspondence  $C_j \in C$  do
9:      $x_i = \text{Project}(p_i, C_j)$ 
10:    Append  $L_j(x_i)$  to labels[ $p_i$ ]
11:   end for
12: end for
13: for each point  $p_i \in P_{3D}$  do
14:   if labels[ $p_i$ ]  $\neq \emptyset$  then
15:     frequency(ID) = Counter(labels[ $p_i$ ])
16:     ID = arg max frequency(ID)
17:   end if
18:   Update  $p_i = (x_i, y_i, z_i, \text{object ID})$ 
19: end for
20: Output: Updated point cloud  $P_{3D}$  with object IDs.
```

---

Table 8. Training time, FPS, and GPU memory comparison

| Scene            | #Objects | Training time |         | FPS         |      | GPU memory  |      |
|------------------|----------|---------------|---------|-------------|------|-------------|------|
|                  |          | GS Grouping   | Ours    | GS Grouping | Ours | GS Grouping | Ours |
| bed (3DOVS)      | 7        | 94 min        | 72 min  | 100         | 80   | ~15G        | ~10G |
| sofa (3DOVS))    | 24       | 55 min        | 31 min  | 110         | 90   | ~18G        | ~12G |
| 1ada (ScanNet++) | 63       | 68 min        | 69 min  | 90          | 50   | ~40G        | ~35G |
| 3e8b (ScanNet++) | 80       | 71 min        | 113 min | 80          | 40   | ~40G        | ~45G |
| 0d2e (ScanNet++) | 90       | 73 min        | 112 min | 80          | 40   | ~40G        | ~45G |

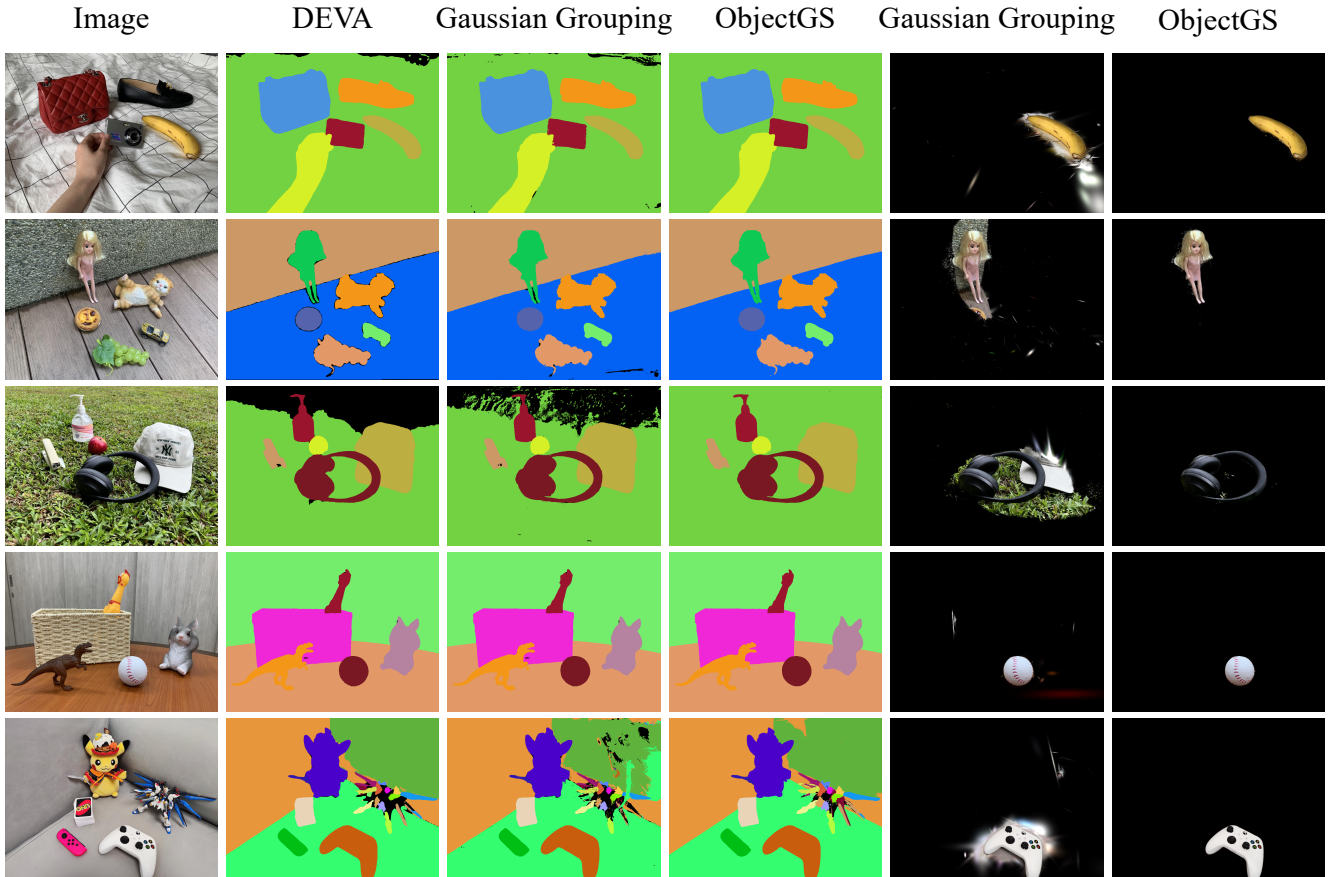

Figure 9. Qualitative comparison of open vocabulary segmentation and 3D object query on the 3DOVS dataset.



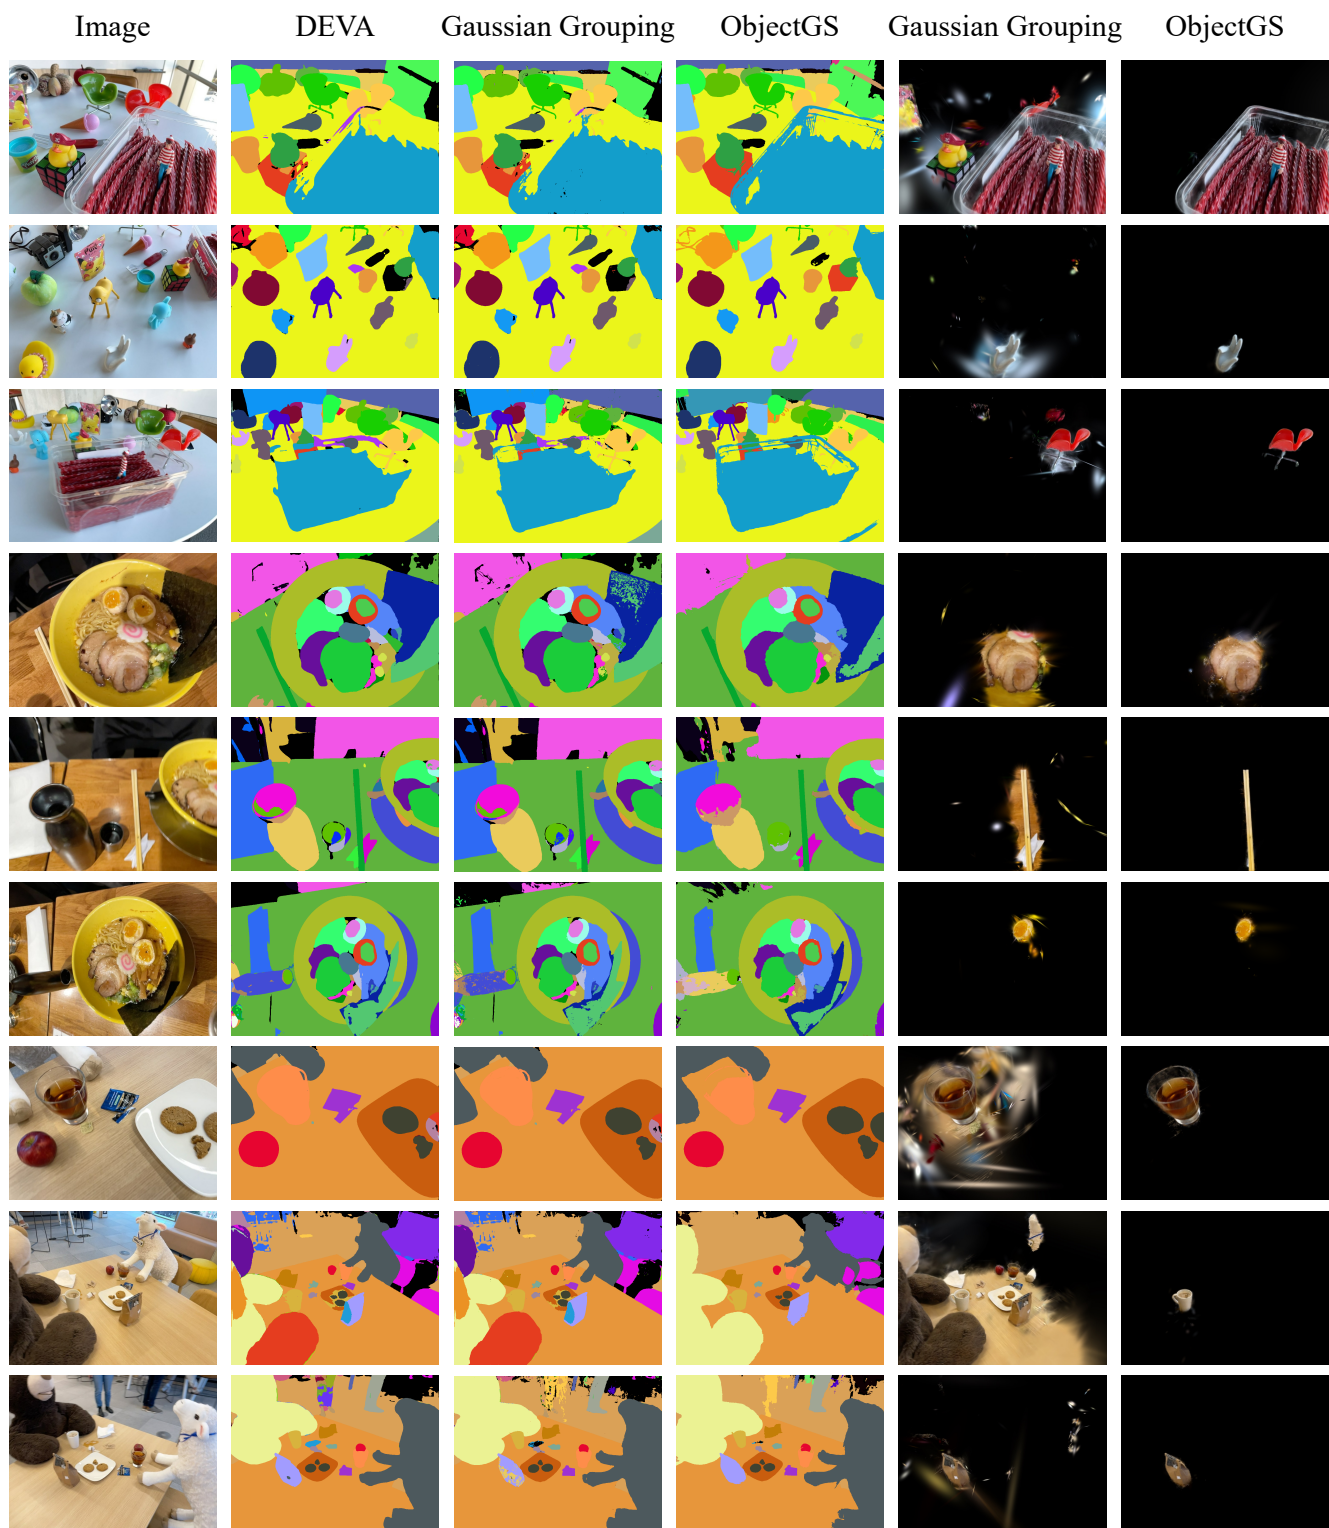

Figure 10. Qualitative comparison of open vocabulary segmentation and 3D object query on the LERF-Mask dataset.



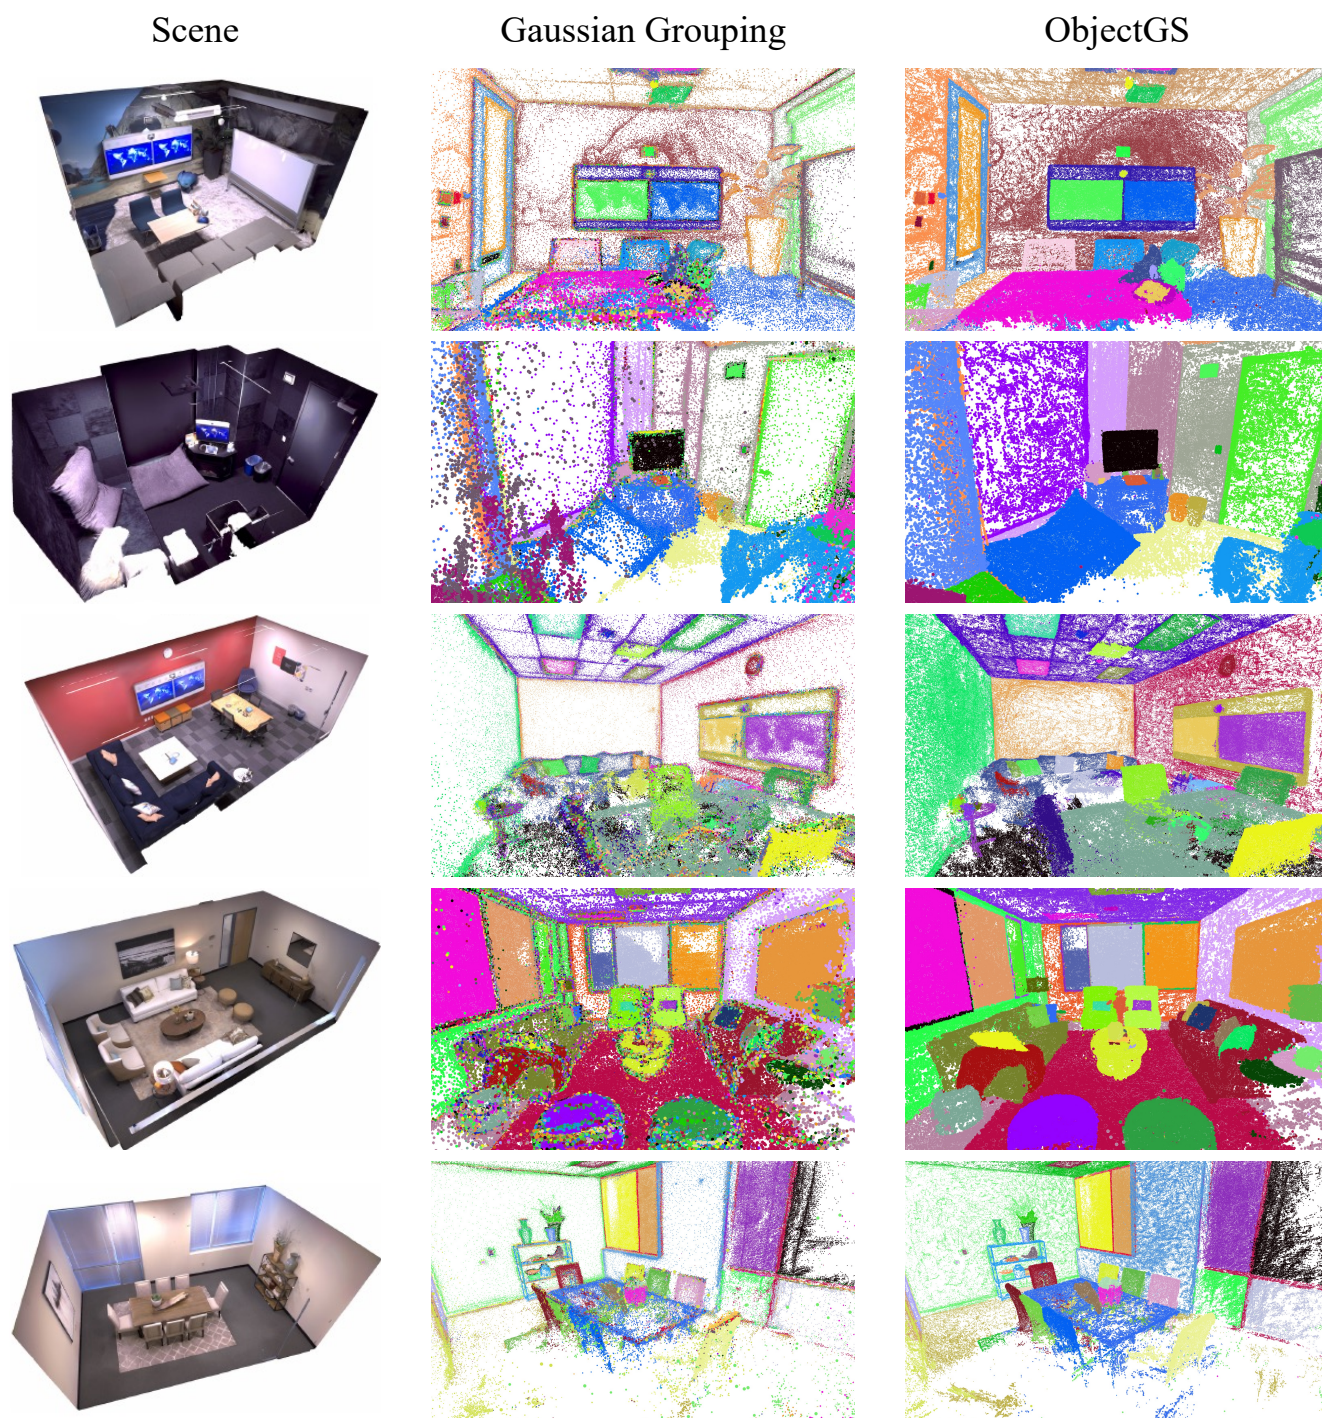

Figure 11. Qualitative comparison of 3D panoptic segmentation on the Replica dataset.



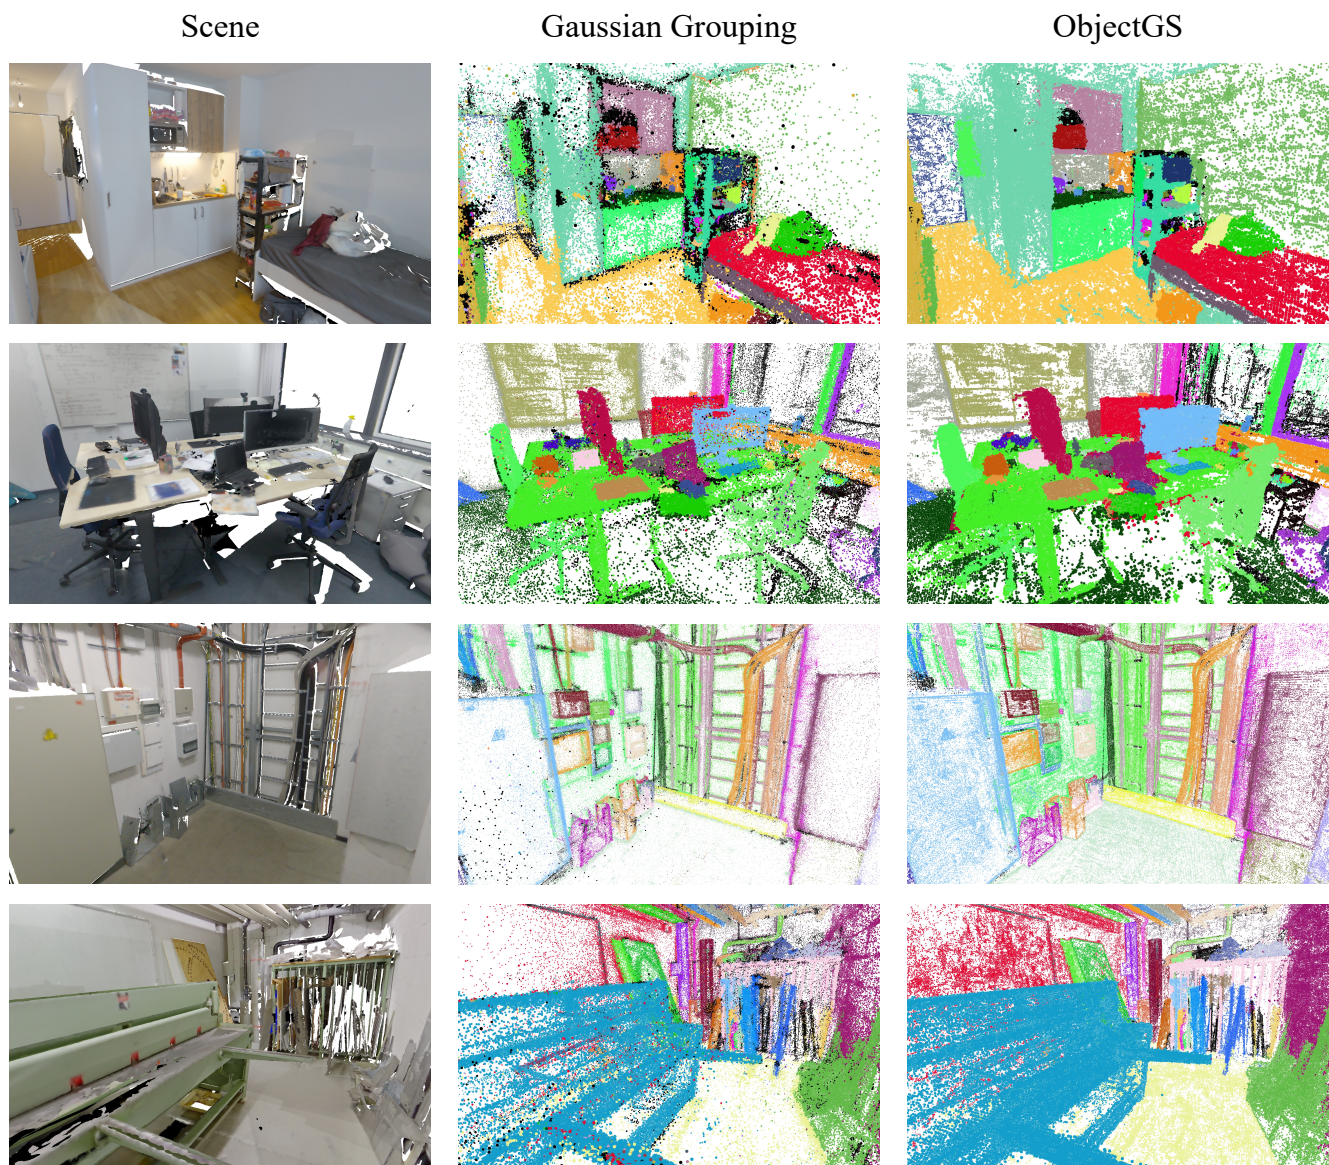

Figure 12. Qualitative comparison of 3D panoptic segmentation on the Scannet++ dataset.

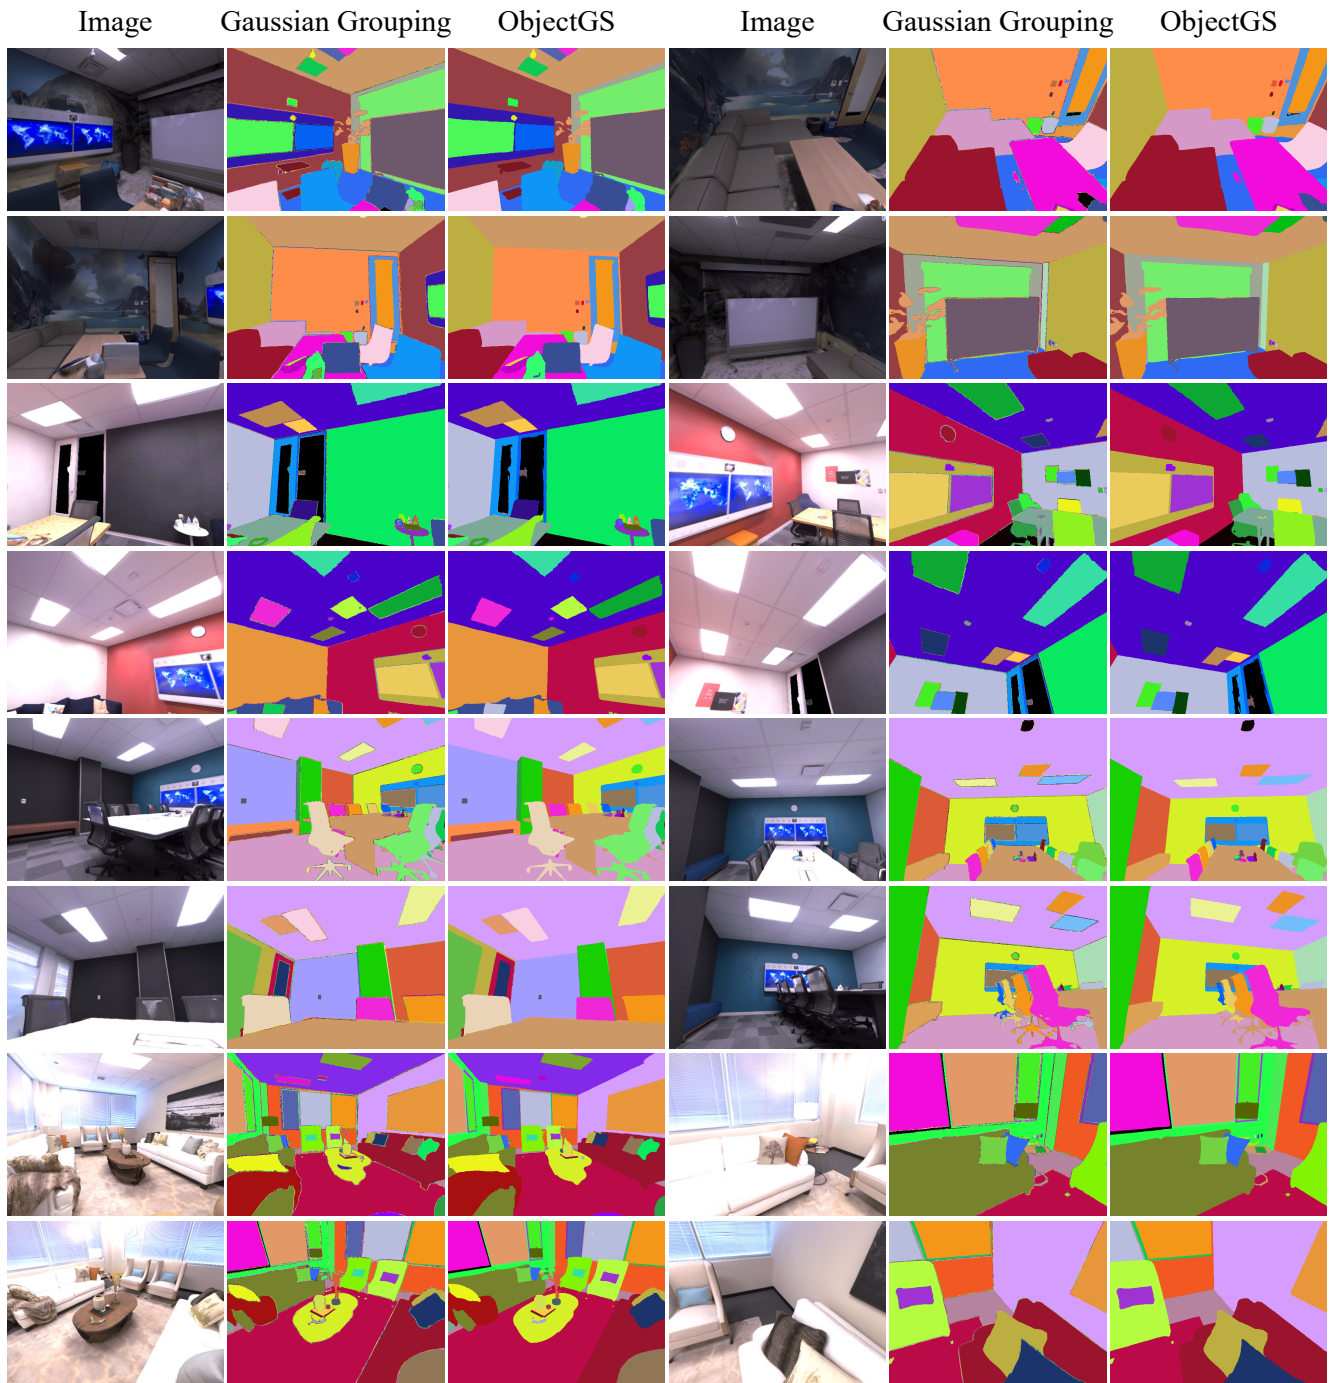

Figure 13. Qualitative comparison of 2D panoptic segmentation on the Replica dataset.



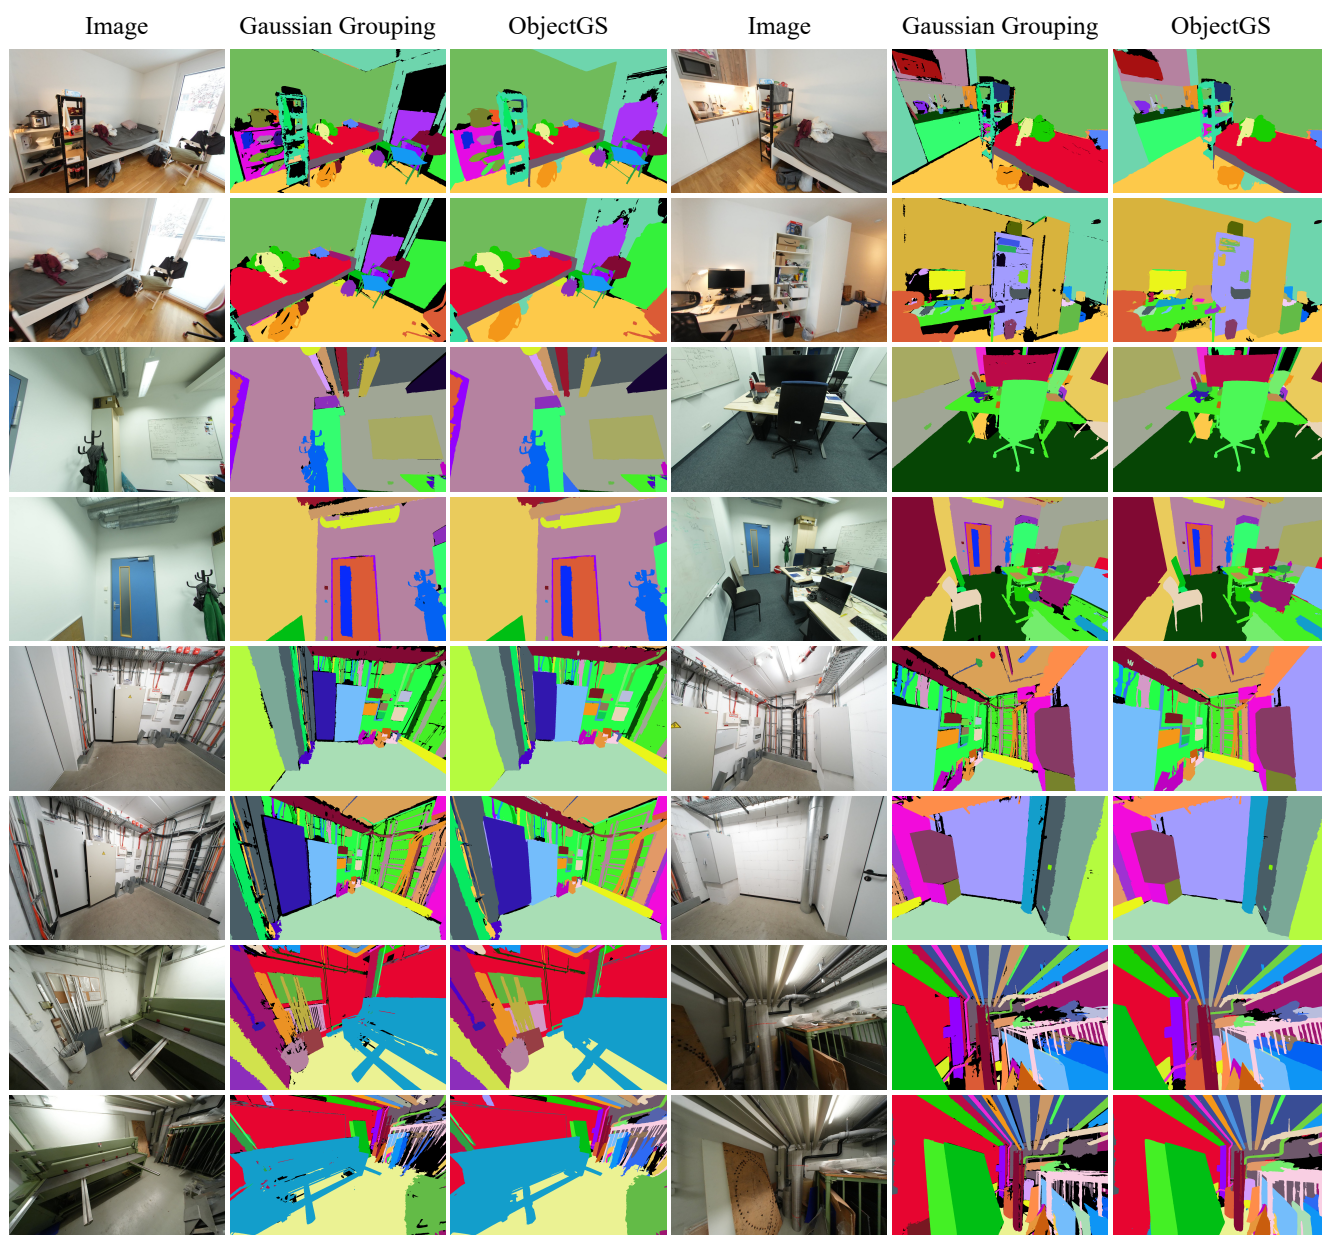

Figure 14. Qualitative comparison of 2D panoptic segmentation on the Scannet++ dataset.
